# Supplementary material
Source: publisher figshare collection journal article supplement (https://diabetesjournals.figshare.com/ndownloader/files/32118269)
Supplement: Supplementary file 1 [file 32118269]

## Online Appendix

**Supplementary Table 1** The gene primer sequences used in experiments

| Gene                   | Primer sequences    |                     |     |     |     |     | Tm    | Product length | GenBank Accession numbers |
|------------------------|---------------------|---------------------|-----|-----|-----|-----|-------|----------------|---------------------------|
| Primer used in RT-qPCR |                     |                     |     |     |     |     |       |                |                           |
| <i>Gapdh</i>           | Forward             | AGG                 | TCG | GTG | TGA | ACG | 60.88 | 95             | XM_0361                   |
|                        | (5'→3')             | GAT                 | TTG |     |     |     |       |                | 65840.1                   |
|                        | Reverse             | GGG                 | GTC | GTT | GAT | GGC | 60.60 |                |                           |
|                        | (3'→5')             | AAC                 | A   |     |     |     |       |                |                           |
| <i>β-catenin</i>       | Forward             | TCA                 | AGA | GAG | CAA | GCT | 60.08 | 115            | NM_0011                   |
|                        | (5'→3')             | CAT                 | CAT | TCT |     |     |       |                | 65902.1                   |
|                        | Reverse             | CAC                 | CTT | CAG | CAC | TCT | 61.05 |                |                           |
|                        | (3'→5')             | GCT                 | TGT | G   |     |     |       |                |                           |
| <i>Axin1</i>           | Forward             | GTTCCAGAGAGGGCTGGT  |     |     |     |     | 59.70 | 282            | NM_0011                   |
|                        | (5'→3')             | G                   |     |     |     |     |       |                | 59598.2                   |
|                        | Reverse             | GCGCTGCACCCTAATACCT |     |     |     |     | 60.88 |                |                           |
|                        | (3'→5')             | C                   |     |     |     |     |       |                |                           |
| Small interfering RNA  |                     |                     |     |     |     |     |       |                |                           |
| <i>Axin1-1</i>         | GAACTGGTATCCACTGATT |                     |     |     |     |     |       |                |                           |
| <i>Axin1-2</i>         | GCCATCTACCGAAAGTACA |                     |     |     |     |     |       |                |                           |
| <i>Axin1-3</i>         | GCCCACTTTGAATGAAGAT |                     |     |     |     |     |       |                |                           |

**Supplementary Table 2** The antibodies used in experiments

| Antibodies                            | Manufactures and catalogue numbers | Application and dilution |
|---------------------------------------|------------------------------------|--------------------------|
| CA1 (29 KDa)                          | Abcam #ab108367                    | WB (1:5000)              |
| CA2 (29 KDa)                          | Abcam #ab124687                    | WB (1:3000)              |
| active $\beta$ -catenin (92 KDa)      | CST #8814                          | WB (1:3000)              |
| $\beta$ -catenin (92 KDa)             | CST #8480                          | IP (1:50)                |
| $\beta$ -catenin (92 KDa)             | CST #9582                          | If (1:100)               |
| $\beta$ -catenin (92 KDa)             | Servicebio #GB11015                | WB (1:5000)              |
| TCF4/7L2 (58, 79 KDa)                 | CST #2569                          | WB (1:2000)              |
| Cyclin D2 (31 KDa)                    | CST #3741                          | WB (1:5000)              |
| ANP (17 KDa)                          | Santa Cruz #sc-515701              | WB (1:5000)              |
| Axin1 (110 KDa)                       | RD #AF3287                         | IF (1:100)               |
| Axin1 (110 KDa)                       | CST #2087                          | WB (1:3000), IP (1:50)   |
| GSK 3 $\beta$ (46 KDa)                | CST #9315                          | WB (1:5000)              |
| phosphor-GSK 3 $\beta$ Ser9 (46 KDa)  | CST #9323                          | WB (1:5000)              |
| CK1 $\alpha$ (34 KDa)                 | Abcam #ab108296                    | WB (1:5000)              |
| phospho-CK1 $\alpha$ Y321 (34 KDa)    | Bioworld #BS4602                   | WB (1:3000)              |
| phospho-CK1 $\alpha$ Thr321 (34 KDa)  | Invitrogen #PA5-36790              | WB (1:3000)              |
| AKT (60 KDa)                          | CST #4691                          | WB (1:3000)              |
| phosphor-AKT 473 (60 KDa)             | CST #4060                          | WB (1:3000)              |
| AMPK $\alpha$ (62 KDa)                | CST #5831                          | WB (1:5000)              |
| phospho-AMPK $\alpha$ (62 KDa)        | CST #2523                          | WB (1:3000)              |
| AMPK $\beta$ 1/2 (30, 38 KDa)         | CST #4150                          | WB (1:5000)              |
| phospho-AMPK $\beta$ 1/2 (30, 38 KDa) | CST #4186                          | WB (1:3000)              |
| $\beta$ tubulin (55 KDa)              | MilliporeSigma #T4026              | WB (1:5000)              |

**Supplementary Table 3** Effects of MTZ on cardiac function in STZ-induced T1DM mice

|                           | Control      | Control+MTZ 50 | T1DM             | T1DM+MTZ 10  | T1DM+MTZ 25    | T1DM+MTZ 50    |
|---------------------------|--------------|----------------|------------------|--------------|----------------|----------------|
| AET (ms)                  | 52.36 ± 1.84 | 51.06 ± 2.56   | 55.93 ± 1.11     | 57.72 ± 2.37 | 57.98 ± 3.29   | 60.04 ± 3.13   |
| IVCT (ms)                 | 10.78 ± 1.08 | 7.52 ± 1.74    | 6.75 ± 0.64 *    | 7.92 ± 1.18  | 11.90 ± 1.39 † | 9.38 ± 1.22    |
| IVRT (ms)                 | 12.18 ± 1.24 | 11.58 ± 1.81   | 11.15 ± 1.20     | 13.11 ± 1.53 | 12.82 ± 2.74   | 7.42 ± 1.33    |
| MV ET (ms)                | 69.91 ± 2.86 | 64.71 ± 2.58   | 69.66 ± 1.86     | 65.81 ± 2.60 | 72.14 ± 4.674  | 62.69 ± 1.21 † |
| MPI                       | 0.52 ± 0.05  | 0.42 ± 0.09    | 0.35 ± 0.03 *    | 0.44 ± 0.06  | 0.58 ± 0.06 †  | 0.30 ± 0.03    |
| Stroke volume (μL)        | 43.07 ± 1.30 | 40.54 ± 2.51   | 34.90 ± 1.15 *** | 37.73 ± 2.10 | 31.49 ± 0.95   | 34.16 ± 1.43   |
| Ejection fraction (%)     | 60.40 ± 1.32 | 55.30 ± 3.72   | 54.47 ± 0.95 *   | 56.08 ± 2.06 | 55.20 ± 1.56   | 57.38 ± 2.57   |
| Fractional shortening (%) | 31.94 ± 0.90 | 28.62 ± 2.34   | 27.83 ± 0.60 *   | 29.01 ± 1.31 | 28.20 ± 1.01   | 29.87 ± 1.74   |
| Cardiac output (mL/min)   | 17.88 ± 0.74 | 19.34 ± 1.58   | 16.25 ± 0.56     | 16.38 ± 1.05 | 12.62 ± 0.78 † | 15.06 ± 0.72   |

\* $p < 0.05$  or \*\*\* $p < 0.001$  vs. CON group; † $p < 0.05$  vs. T1DM; n = 3-10.

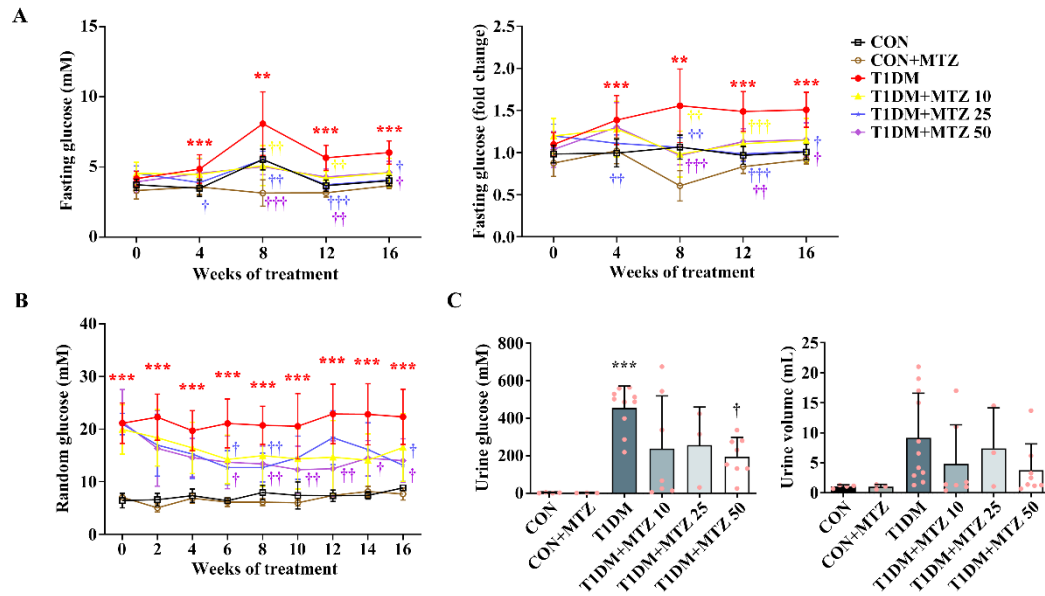

**Supplementary Figure 1** Methazolamide showed a hypoglycemic effect and improved glucose tolerance in T1DM mice.

**A:** Fasting blood glucose levels (**Left**) and its fold change (**Right**) in various groups of mice at the indicated time-points. **B:** The random blood glucose levels of several groups' mice in the indicated times. **C:** The total urine glucose concentration and the urine volume of several groups' mice in the indicated groups in 24 h. \*\* $P < 0.01$  or \*\*\* $P < 0.001$  vs. Control;  $^{\dagger}P < 0.05$ ,  $^{\dagger\dagger}P < 0.01$ , or  $^{\dagger\dagger\dagger}P < 0.001$  vs. T1DM;  $n = 3-10$  mice per group.

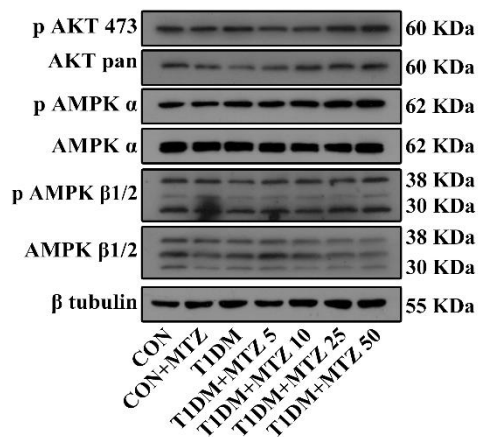

**Supplementary Figure 2** Methazolamide did not affect AKT and AMPK pathway in T1DM mice heart. Representative western blot results of the relative protein levels of p AKT473, AKT, p AMPK $\alpha$ , AMPK $\alpha$ , p AMPK $\beta 1/2$ , and AMPK $\beta 1/2$  in hearts from

the indicated groups.

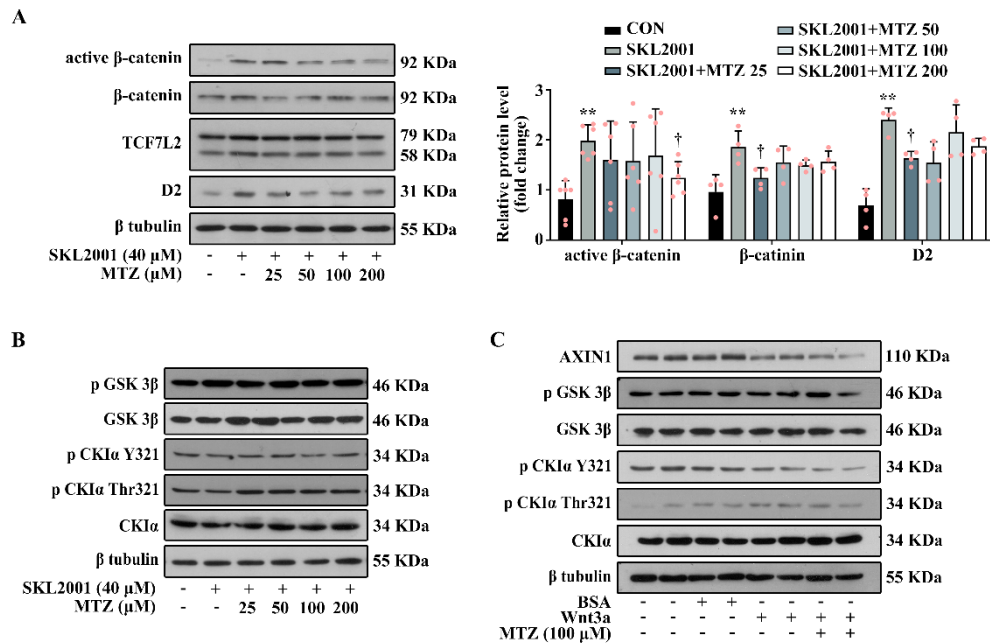

**Supplementary Figure 3** Methazolamide attenuated Wnt/β-catenin pathway in SKL2001- or Wnt3a-treated NRCMs.

**A:** Representative Western blot and quantitative results of the relative protein levels of active β-catenin, β-catenin, TCF7L2, and D2 in NRCMs subject to SKL2001 with or without MTZ (48 h). \*\* $P < 0.01$  vs. Control; † $P < 0.05$  vs. SKL2001. The above results from four to six independent experiments. **B:** Representative Western blot results of the relative protein levels of β-catenin degradation complex members (p GSK3β, GSK3β, p CKIα, and CKIα) in NRCMs treated as indicated in A. **C:** Representative western blot results of the relative protein levels of β-catenin degradation complex members (p GSK3β, GSK3β, p CKIα, and CKIα) in NRCMs subject to Wnt3a with or without MTZ (48 h).

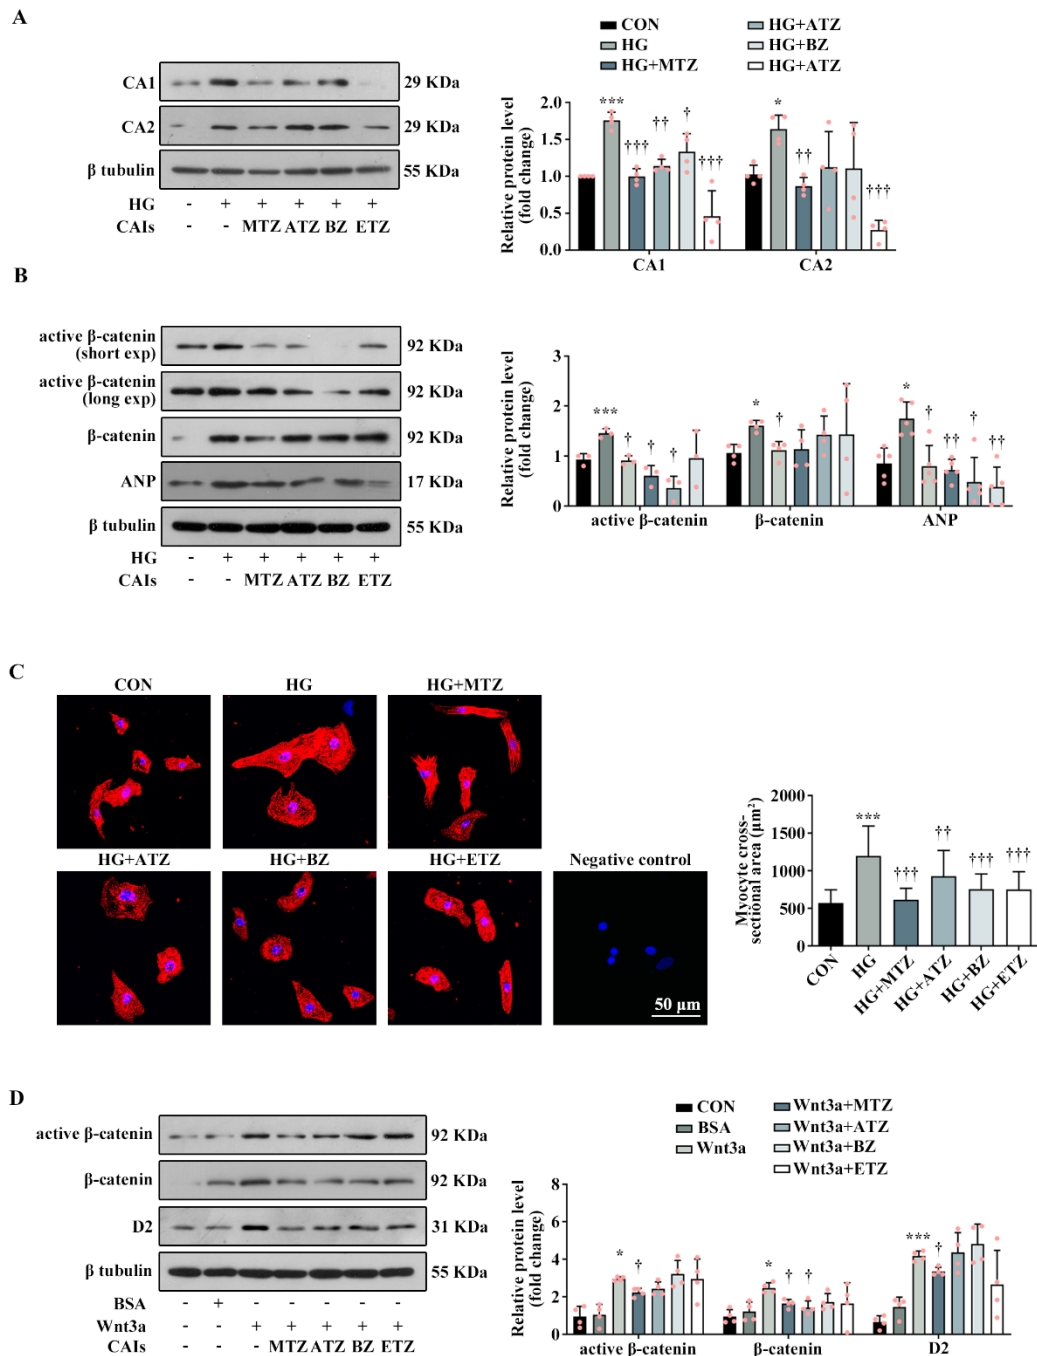

**Supplementary Figure 4** CA inhibitors decreased CAs and β-catenin in high glucose- or Wnt3a-treated NRCMs.

**A** and **B**: Representative Western blot and quantitative results of the relative protein levels of CAs, active β-catenin, β-catenin and ANP in NRCMs subject to high glucose (HG) without or with CA inhibitors (48 h). \* $P < 0.05$  or \*\*\* $P < 0.001$  vs. Control; † $P < 0.05$ , †† $P < 0.01$ , or ††† $P < 0.001$  vs. HG. The above results from three to five

**independent experiments.** **C:** Representative images of  $\alpha$ -actinin staining and quantification of cell size were shown in the indicated groups (red:  $\alpha$ -actinin, blue: DAPI;  $n = 60$  NRCMs per group). \*\*\* $P < 0.001$  vs. Control;  $^{\dagger\dagger}P < 0.01$  or  $^{\dagger\dagger\dagger}P < 0.001$  vs. HG. **D:** Representative Western blot and quantitative results of the relative protein levels of active  $\beta$ -catenin,  $\beta$ -catenin, and cyclin D2 in NRCMs subject to Wnt3a with or without CA inhibitors (48 h). \* $P < 0.05$  or \*\*\* $P < 0.001$  vs. Control;  $^{\dagger}P < 0.05$  vs. Wnt3a. **The above results from four independent experiments.**

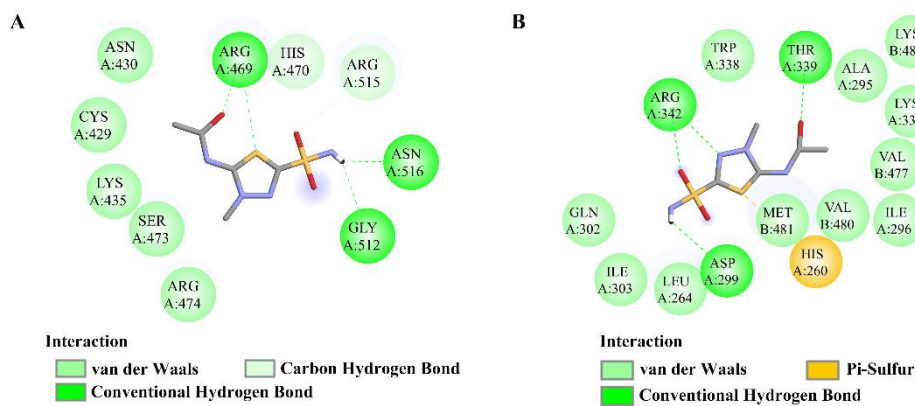

**Supplementary Figure 5** The 2D diagram of ligand-receptor interaction in molecular docking was performed. **A:** MTZ- $\beta$ -catenin interaction. **B:** MTZ- $\beta$ -catenin-AXIN1 interaction; A chain:  $\beta$ -catenin; B chain: AXIN1.

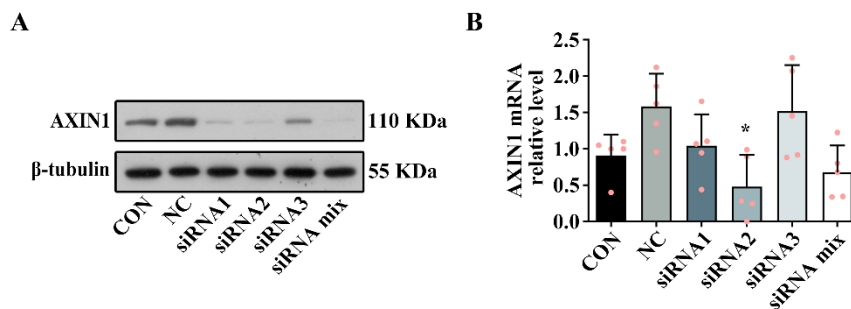

**Supplementary Figure 6** AXIN1 was inhibited in AXIN1 siRNA -treated NRCMs. **A:** Representative western blot results of AXIN1 in NRCMs subject to negative control (NC) or AXIN1 siRNA. **B:** Quantitative results of the relative mRNA levels of AXIN1 in NRCMs subject to NC or AXIN1 siRNA. \* $P < 0.05$  vs. NC. The above results from

five independent experiments.
